# Supplementary material for: Contact tracing – Old models and new challenges
Source: PubMed Central journal article supplement — Infect Dis Model. 2020 Dec 30;6:222–31. doi: 10.1016/j.idm.2020.12.005 (PMC7806945; doi:10.1016/j.idm.2020.12.005), 2020-12-30
Supplement: mmc1.pdf [file mmc1.pdf]

# Contact Tracing – Old Models and New Challenges – SI

Johannes Müller<sup>1,2</sup>, Mirjam Kretzschmar<sup>3</sup>

<sup>1</sup> Mathematical Institute, Technical University of Munich, Boltzmannstr. 3, 85748 Garching, Germany

<sup>2</sup> Institute for Computational Biology, Helmholtz Center Munich, 85764 Neuherberg, Germany

<sup>3</sup> Julius Center for Health Sciences and Primary Care, University Medical Center Utrecht, Utrecht University, Heidelberglaan 100, 3584CX Utrecht, The Netherlands

## 1 Contact Tracing – Literature overview

The table orders the papers primarily according to the infection they aim to investigate resp. for the rather theoretical papers, by the method used. If several infections are discussed, the paper nevertheless appears only once.

Abbreviations:

CT: contact tracing

DCT: digital contact tracing

phenomen.: phenomenological approach (ODE)

| author                            | infection             | method                                         | term for CT                                        | CT delay | remarks                                                                           | outcome(w.r.t. CT)                                                                |
|-----------------------------------|-----------------------|------------------------------------------------|----------------------------------------------------|----------|-----------------------------------------------------------------------------------|-----------------------------------------------------------------------------------|
| <b>Chlamydia &amp; Gonorrhoea</b> |                       |                                                |                                                    |          |                                                                                   |                                                                                   |
| Clark et al. 2012 [20]            | Chlamydia             | pair approx.                                   | removal rate on infected-diagnosed pairs           | -        | based on [26, 40]                                                                 | CT is efficient particularly below a certain prevalence                           |
| Clark et al. 2013 [21]            | Chlamydia             | IBM + phenomen. ODE SI                         | IBM: direct; ODE: power law in $I$                 | -        | power law adapted to IBM simulations; optimal resource allocations (CT/screening) | CT is efficient and uses resources efficient                                      |
| Heffernan et al. 2009 [36]        | Chlamydia             | phenomen. / ODE SI                             | mass action law                                    | -        | model includes random screening (yield index cases) and CT                        | model results in line with data                                                   |
| Hethcote et al 1984 [39]          | Gonorrhoea            | phenomen. ODE                                  | decreased incidence                                | -        | introduce backward and forward tracing                                            | pioneering work about CT                                                          |
| Kretzschmar et al. 1996 [57]      | Gonorrhoea, Chlamydia | IBM with household structure                   | identification of a fraction $p$ of partners       | -        | one-step tracing                                                                  | prevalence for different control scenarios                                        |
| Kretzschmar et al. 2009 [55]      | Chlamydia             | IBM                                            | direct formulation                                 |          | three different IBM models previously published by different authors are compared | the results of the models are somewhat different, due to their complexity         |
| Turner et al. 2006 [83]           | Chlamydia             | IBM                                            | direct formulation                                 | +        | model with pair formation, CT within pairs                                        | Model fits data, and yields comparable results comparable studies                 |
| <b>Ebola</b>                      |                       |                                                |                                                    |          |                                                                                   |                                                                                   |
| Berge et al. 2018 [13]            | Ebola                 | phenomen. / ODE, SEIR                          | fixed fraction of newly infecteds go to quarantine | -        | CT not explicitly formulated                                                      | stationary states and their stability analysed                                    |
| Browne et al. 2015 [17]           | Ebola                 | branching process/ODE, SEIR                    | fixed fraction of newly infecteds go to quarantine | +        | fraction of detected cases is computed based on the branching-process             | paper aims at a theoretical framework that is feasible for practical applications |
| Shahtori et al. 2018 [78]         | Ebola                 | IBM, homogeneous population                    | direct formulation                                 | +        | onset of infection only                                                           | crucial that CT is implemented at the beginning of the outbreak                   |
| Rivers et al. 2014 [76]           | Ebola                 | phenomen., stoch. sim on pop.-level.+ODE, SEIR | increased diagnosis rate                           | -        | CT not explicitly formulated                                                      | reduction of $R_{eff}$ by around 30% possible                                     |

| author                      | infection            | method                                                  | term for CT                                             | CT delay | remarks                                                                              | outcome(w.r.t. CT)                                                                                   |
|-----------------------------|----------------------|---------------------------------------------------------|---------------------------------------------------------|----------|--------------------------------------------------------------------------------------|------------------------------------------------------------------------------------------------------|
| <b>HIV</b>                  |                      |                                                         |                                                         |          |                                                                                      |                                                                                                      |
| de Arazoza et al. 2002 [23] | HIV                  | phenomen. / ODE SI                                      | mass action                                             | -        | three classes of infecteds modelled: infecteds do /do not know their infection, AIDS | stability analysis of stationary points, comparison with data                                        |
| Cléménçon et al. 2008 [22]  | HIV                  | phenomen. / stoch. process (population level), SDE, ODE | several terms: linear, mass action, saturation function | -        | extension of de Azoza [23]                                                           | development of statistical tools (maximum likelihood estimators)                                     |
| Blum et al. 2010 [14]       | HIV                  | phenomen. / stochastic model on population level        | linear and saturation                                   | +        | see also [68, 79]                                                                    | Bayes interference (ABC and Metropolis Hastings) for estimating ct probability                       |
| Hsieh et al. 2005 [41]      | HIV                  | phenomen. / ODE SI                                      | several terms: linear, mass action, saturation function | -        | extension of de Azoza [23]                                                           | mass action inappropriate, linear or saturation term for CT better                                   |
| Hsieh et al. 2010 [42]      | HIV                  | phenomen. / ODE SI                                      | saturation function; two-step tracing                   | -        | extension of de Azoza [23]                                                           | stability analysis of stationary points, $R_{eff}$ ; two-step tracing superior over one-step tracing |
| Hyman et al. 2003 [44]      | HIV                  | phenomen. / ODE SI                                      | mass action                                             | -        | two models: core group, different stages of HIV                                      | $R_{eff}$ , sensitivity analysis                                                                     |
| Mellor et al. 2001 [66]     | HIV and Tuberculosis | IBM with household structure                            | screening the household                                 | -        | casual contacts are not traced; HIV and Tuberculosis at the same time                | cross-tracing of HIV and Tuberculosis is effective                                                   |
| Naresh et al. 2006 [72]     | HIV                  | phenomen. / ODE SI                                      | fixed fraction of newly infecteds know their infection  | -        | CT is not triggered by diagnosis, but infections of known infecteds                  | stability analysis of stationary points                                                              |
| <b>Influenza</b>            |                      |                                                         |                                                         |          |                                                                                      |                                                                                                      |
| Agarwal et al. 2012 [1]     | Influenza            | phenomen. / ODE SIR                                     | fraction of newly infecteds go to quarantine            | -        | two risk classes in susceptibles are considered                                      | Dynamical systems analysis, $R_{eff}$                                                                |
| <b>Measles</b>              |                      |                                                         |                                                         |          |                                                                                      |                                                                                                      |
| Liu et al. 2015 [62]        | Measles              | IBM, inhomogeneous population                           | direct formulation                                      | +        | complex/realistic contact structure                                                  | CT can significantly contribute to control a measles outbreak                                        |

| author                       | infection                               | method                                             | term for CT                                             | CT delay | remarks                                                                          | outcome (w.r.t. CT)                                                                             |
|------------------------------|-----------------------------------------|----------------------------------------------------|---------------------------------------------------------|----------|----------------------------------------------------------------------------------|-------------------------------------------------------------------------------------------------|
| <b>SARS</b>                  |                                         |                                                    |                                                         |          |                                                                                  |                                                                                                 |
| Becker et al. 2005 [11]      | SARS                                    | phenomen. / next generation operator               | reduction of incidence                                  | -        | article exclusively aims at $R_{eff}$ , no dynamics.                             | formula for $R_{eff}$ ; social distancing together with CT can control SARS                     |
| Chen et al. 2006 [19]        | Influenza, Measles, Chickenpox, SARS    | phenomen. / PDE                                    | fixed fraction of newly infecteds are eventually traced | -        | based on Fraser [33]; only $R_{eff}$ , no dynamics; airborne infection           | Probability to control an outbreak is estimated                                                 |
| Kwok et al. 2019 [61]        | SARS                                    |                                                    |                                                         |          | review article                                                                   |                                                                                                 |
| Fraser et al. 2004 [33]      | Theory & Influenza, SARS, Smallpox, HIV | phenomen. / PDE                                    | fixed fraction of newly infecteds are eventually traced | -        | basic model, used in applications [19, 31]                                       | timing of incubation period and latency period is central for CT                                |
| Lloyd-Smith et al. 2003 [63] | SARS                                    | phenomen. / time-discrete stoch. sim on pop.-level | increased transition rate to quarantine                 | +        | CT not explicitly formulated                                                     | crucial that CT is implemented at the beginning of the outbreak                                 |
| <b>SARS-CoV-2</b>            |                                         |                                                    |                                                         |          |                                                                                  |                                                                                                 |
| Aleta et al. 2020 [2]        | SRAS-CoV-2                              | IBM, inhomogeneous population                      | direct formulation                                      | +        | detailed social graph for the Boston area used                                   | a second infection wave can be controlled by massive testing/tracing; CT is indispensable.      |
| Barrat et al. 2020 [9]       | SARS-CoV-2                              | IBM, inhomogeneous population                      | direct formulation                                      | +        | follow-up of Di Dimenico et al. 2020 [24] with DCT; preprint                     | Linear effect for manual CT in tracing probability, quadratic effect for DCT                    |
| Bradshaw et al. 2020 [15]    | SARS-CoV-2                              | IBM, homogeneous population                        | direct formulation                                      | +        | preprint; DCT considered, focus on onset, $R_{eff}$ and prob. for major outbreak | backward tracing and high abundance of DCT devices necessary                                    |
| Braithwaite et al. 2020 [16] | SARS-CoV-2                              |                                                    |                                                         |          | review article, focused on DCT                                                   |                                                                                                 |
| Bulchandani et al. 2020 [18] | SARS-CoV-2                              | IBM, homogeneous population                        | direct formulation                                      | -        | preprint; DCT considered, focus on onset, heuristic formula for $R_{eff}$        | High DCT-device coverage necessary                                                              |
| Di Dimenico et al. 2020 [24] | SRAS-Cov-2                              | IBM, inhomogeneous population                      | direct formulation                                      | +        | age-structured IBM with social graph for Île-de-France; preprint                 | CT necessary for control; lifting the lockdown with no exit strategy induces a huge second wave |
| Ferretti et al. 2020 [31]    | SARS-CoV-2                              | phenomen. / PDE                                    | fixed fraction of newly infecteds are eventually traced | +        | based on Fraser [33]; DCT considered, heuristic formula for $R_{eff}$            | SARS-CoV-2 controllable by DCT                                                                  |
| Firth et al. 2020 [32]       | SRAS-CoV-2                              | IBM, inhomogeneous population                      | direct formulation                                      | +        | DCT with informing contactees of contactees (second level tracing)               | tracing+testing can prevent a second wave, a high fraction of persons need to be quarantined    |
| Giordano et al. 2020 [34]    | SARS-CoV-2                              | phenomenol., ODE/SIR                               | increased rate for removal                              | -        | detailed ODE model                                                               | CT is a central element in controlling the infection                                            |

| author                            | infection  | method                              | term for CT                                                                              | CT delay | remarks                                                                                            | outcome (w.r.t. CT)                                                                              |
|-----------------------------------|------------|-------------------------------------|------------------------------------------------------------------------------------------|----------|----------------------------------------------------------------------------------------------------|--------------------------------------------------------------------------------------------------|
| Grasly et al. 2020 [35]           | SARS-CoV-2 | Phen. approach                      | approximates linearly one-step tracing in a tree                                         | -        | resembles approach by Fraser [33]                                                                  | $R_{eff}$ approximated; testing, tracing, quarantine and social distancing can control covid-19  |
| Hellewell et al. 2020 [37]        | SARS-CoV-2 | IBM, homogeneous population         | direct formulation                                                                       | -        | onset of epidemic considered                                                                       | high tracing probability necessary to control the infection                                      |
| Hernandez-Orallo et al. 2020 [38] | SARS-CoV-2 | IBM, inhomogeneous population + ODE | direct formulation (IBM) / fixed fraction of newly infecteds are eventually traced (ODE) | +        | simulations based on empirical contact network                                                     | CT needs to be precise in order to avoid many persons in quarantine                              |
| Juneau et al. 2020 [45]           | SRAS-CoV-2 |                                     |                                                                                          |          | review article; preprint                                                                           |                                                                                                  |
| Keeling et al. 2020 [49]          | SARS-CoV-2 | IBM, homogeneous population         | direct formulation                                                                       | -        | preprint; time and intensity of contacts vary, simulation-based estimation of $R_{eff}$ ;          | high tracing probability necessary to control the infection                                      |
| Kim et al. 2020 [50]              | SARS-CoV-2 | Stochastic branching process        | verbally                                                                                 | -        | preprint; DCT considered; Heuristic calculations of efficiency                                     | heuristic formula for efficiency                                                                 |
| Kretzschmar et al. [59]           | SARS-CoV-2 | IBM, homogeneous population         | direct formulation                                                                       | +        | preprint; Model based on Kretzschmar(2004) [56]; preprint                                          | middle range tracing probability necessary to control diseases                                   |
| Kretzschmar et al. [58]           | SARS-CoV-2 | IBM, homogeneous population         | direct formulation                                                                       | +        | preprint; Model based on Kretzschmar [56]; DCT considered, combined with conventional CT; preprint | tracing delays need to be minimised for effective CT; DCT might be a way to speed up the process |
| Kucharski et al. [60]             | SARS-CoV-2 | IBM, inhomogeneous population       | direct formulation                                                                       | -        | preprint; DCT considered, combined with conventional CT                                            | CT more efficient than mass testing                                                              |
| Lorch et al. [64]                 | SARS-CoV-2 | IBM with discrete spatial structure | one-step tracing, if at similar times in the same location                               | -        | DCT considered, combined with conventional CT; preprint                                            | DCT efficient particularly in case of a low fraction of quarantined persons                      |

| author                    | infection    | method                                                                        | term for CT                                                   | CT delay | remarks                                                                                                 | outcome (w.r.t. CT)                                                                                          |
|---------------------------|--------------|-------------------------------------------------------------------------------|---------------------------------------------------------------|----------|---------------------------------------------------------------------------------------------------------|--------------------------------------------------------------------------------------------------------------|
| Lunz et al. [65]          | SARS-CoV-2   | phenomen. / ODE SEIR                                                          | removal rate, mass action                                     | -        | the tracing rate is connected to contact heterogeneity but not based on first principles; preprint      | optimal CT defined as minimising the total number of individuals that go into quarantine during the outbreak |
| Pollmann et al. 2020 [74] | SARS-CoV-2   | IBM, (homogeneous and inhomogeneous version) and two branching process models | direct formulation                                            | +        | IBMs with models of type [71] and [17] compared; analytic results for DCT in branching models; preprint | CT is able to control the outbreaks, many individuals go to quarantine without precise protocol              |
| Tanaka et al. [79]        | SARS-CoV-2   | IBM, homogeneous population                                                   | direct formulation                                            | -        | simulation of clusters detected by CT as input for stats (see also Blum [14]); preprint                 | Bayesian parameter estimation based on CT                                                                    |
| <b>Smallpox</b>           |              |                                                                               |                                                               |          |                                                                                                         |                                                                                                              |
| Eichner 2003 [28]         | Smallpox     | phenomen. / Stochastic model on population level                              | all close contacts and fraction of casual contacts are traced | -        | age of infection included in the model                                                                  | critical tracing probability estimated                                                                       |
| Kaplan et al. 2002 [46]   | Smallpox     | phenomen. / ODE                                                               | saturation function                                           | -        | contactees who are traced are vaccinated                                                                | mass vaccination superior to vaccination triggered by CT                                                     |
| Kretzschmar et al. [56]   | Smallpox     | Stochastic branching process                                                  | direct formulation                                            | +        | ring vaccination triggered by contact tracing                                                           | delay in CT is crucial                                                                                       |
| Porco et al. 2004 [75]    | Smallpox     | IBM with household structure                                                  | direct formulation                                            | +        | one step and two-step tracing compared                                                                  | massive CT and ring vaccination can control the outbreak.                                                    |
| <b>Tuberculosis</b>       |              |                                                                               |                                                               |          |                                                                                                         |                                                                                                              |
| Aparicio et al. 2006 [3]  | Tuberculosis | phenomen. / ODE SEIR                                                          | fixed fraction of newly infecteds are identified              | -        | CT not explicitly formulated                                                                            | simulation of prevalence                                                                                     |
| Begun et al. 2013 [12]    | Tuberculosis |                                                                               |                                                               |          | review article                                                                                          |                                                                                                              |
| Kasaie et al. 2014 [47]   | Tuberculosis | IBM with household structure                                                  | screening the household                                       | -        | contacts outside the household are not traced                                                           | household tracing reduces the incidence by 2%-3%                                                             |
| Tian et al. 2011 [80]     | Tuberculosis | IBM, inhomogeneous population                                                 | direct formulation                                            | +        | different scenarios, sensitivity analysis                                                               | simulation of prevalence                                                                                     |
| Tian et al. 2013 [81]     | Tuberculosis | IBM, inhomogeneous population                                                 | direct formulation                                            | +        | Follow-up of Tien [80]                                                                                  | simulation of prevalence                                                                                     |

| author                       | infection                                                  | method                       | term for CT        | CT delay | remarks                                                                                                                                                        | outcome(w.r.t. CT)                                                   |  |
|------------------------------|------------------------------------------------------------|------------------------------|--------------------|----------|----------------------------------------------------------------------------------------------------------------------------------------------------------------|----------------------------------------------------------------------|--|
|                              | <b>Theory</b>                                              | <b>branching process</b>     |                    |          |                                                                                                                                                                |                                                                      |  |
| Ball et al. 2011 [6]         | Theory                                                     | Stochastic branching process | direct formulation | -        | SIR, focus on fixed and exponentially distributed infectious period                                                                                            | analytic approach, bounds on $R_{eff}$ , extinction probability      |  |
| Ball et al. 2015 [7]         | Theory                                                     | Stochastic branching process | direct formulation | +        | SEIR, follow up of Ball [6]                                                                                                                                    | effect of tracing delay, $R_{eff}$ , extinction prob.                |  |
| Barlow 2020 [8]              | Theory                                                     | Branching process            | direct formulation | -        | extends the percolation-based analysis/generating functions to CT; preprint                                                                                    | approximate expression for the probability for extinction            |  |
| Baumgarten et al. 2020 [10]  | Theory                                                     | Stochastic branching process | direct formulation | -        | uses ideas of percolation theory; time-discrete model; DCT; preprint                                                                                           | Approximation of $R_0$ , compares result with stochastic simulations |  |
| Endo et al. 2020 [29]        | Theory                                                     | Stochastic branching process | direct formulation | -        | uses three generations to approximate the effect of CT with an index case in the middle generation (backward+forward tracing); time-discrete process; preprint | approximate results for $R_{eff}$ in presence of overdispersion      |  |
| Müller et al. 2000 [71]      | Theory                                                     | Stochastic branching process | direct formulation | -        | focus on age since infection                                                                                                                                   | $R_{eff}$ , ODE approximation, critical tracing probability          |  |
| Müller et al. 2007 [68]      | Theory                                                     | Stochastic branching process | direct formulation | -        | based on Müller [71], see also [14, 79]                                                                                                                        | estimation of tracing probability                                    |  |
| Müller et al. 2016 [70],     | Theory                                                     | Stochastic branching process | direct formulation | +        | based on Müller [71]                                                                                                                                           | effect of tracing delay and latency period, $R_{eff}$                |  |
| Müller et al. 2020 [69],     | Theory                                                     | Stochastic branching process | direct formulation | -        | based on Müller [71], focus on superspreader events                                                                                                            | Mechanism fo CT in case of superspreaders is different from usual CT |  |
| Okolie et al. 2018 [73]      | Theory                                                     | Stochastic branching process | direct formulation | -        | connects branching process and pair approx., based on Müller [71]                                                                                              | effect of a random contact graph on CT                               |  |
| Klinkenberg et al. 2006 [53] | Theory & influenza, smallpox, SARS, foot-and-mouth disease | Stochastic branching process | direct formulation | +        | single-step and recursive tracing                                                                                                                              | mostly: single step and recursive tracing is equal effective         |  |
| Shaban et al. 2008 [77]      | Theory                                                     | Stochastic branching process | direct formulation | -        | Vaccination of detected individuals                                                                                                                            | $R_{eff}$ , probability for extinction, simulation of final size     |  |
| Kojaku et al. 2020 [54]      | Theory                                                     | Stochastic branching process | direct formulation | -        | CT on random graph, focus on generating functions for the degree; preprint                                                                                     | CT highly efficient as nodes with high degree are traced             |  |

| author                     | infection     | method                               | term for CT                 | CT delay | remarks                                                                             | outcome(w.r.t. CT)                                                                       |
|----------------------------|---------------|--------------------------------------|-----------------------------|----------|-------------------------------------------------------------------------------------|------------------------------------------------------------------------------------------|
|                            | <b>Theory</b> | <b>IBM</b>                           |                             |          |                                                                                     |                                                                                          |
| Armbruster et al. 2007 [4] | Theory        | IBM, lattice graph                   | direct formulation          | -        | addresses a cost-efficiency analysis; follow-up of Armbruster et al. [5]            | CT only cost efficient if prevalence is small                                            |
| Kiss et al. 2006 [51]      | Theory        | IBM, inhomogeneous population        | direct formulation          | -        | isolation of susceptible; scale free and Poisson network                            | For scale free networks, tracing effect less sensitive to the epidemiological parameters |
| Kiss et al. 2008 [52]      | Theory        | IBM, inhomogeneous population        | direct formulation          | -        | assortatively / disassortatively mixing networks; Single-step and recursive tracing | CT more effective in disassociative networks; recursive tracing more efficient           |
| Farrahi et al. [30]        | Theory        | IBM, inhomogeneous population        | direct formulation          | +        | first model for DCT                                                                 | DCT can be efficient even if the fraction of app-users is small                          |
|                            | <b>Theory</b> | <b>pair approximation</b>            |                             |          |                                                                                     |                                                                                          |
| Eames et al. 2002 [26]     | Theory / STD  | pair approx.& stoch sim.             | direct formulation          | -        | this paper introduced pair approximation for CT                                     | modelling CT by pair approximation                                                       |
| Eames et al. 2003 [27]     | Theory        | pair approx.& stoch sim.             | direct formulation          | -        | based on Eames [26]                                                                 | critical tracing probability                                                             |
| Eames et al. 2005 [48]     | Theory        | pair approx.& stoch sim.             | direct formulation          | -        | based on [26]; focus on different social graphs (small world, scale-free)           | network structure influence efficiency of CT                                             |
| Eames 2007 [25]            | Theory        | pair approx.& stoch sim.             | direct formulation          | -        | based on Eames [26]                                                                 | recursive CT much more effective than one-step CT; "targeted CT": focus on core groups   |
| House et al. 2010 [40]     | Theory        | pair approx.& stoch sim.             | direct formulation          | -        | based on Eames [26]; focus on different social graphs (small world, scale-free)     | CT has higher efficiency in clustered contact graphs                                     |
| Huerta et al. 2002 [43]    | Theory        | pair approx.& stoch sim.             | direct formulation          | -        | develop pair approximation for CT                                                   | rewiring of contact network decreases CT                                                 |
| Tsimering et al. 2003 [82] | Theory        | pair approx.& stoch sim.             | direct formulation          | -        | based on Huerta [43]                                                                | rewiring of contact network decreases CT                                                 |
|                            | <b>Theory</b> | <b>phenomenological approach</b>     |                             |          |                                                                                     |                                                                                          |
| Armbruster et al. 2007 [5] | Theory        | phenomen. / ODE                      | linear removal term         | -        | addresses a cost-efficiency analysis                                                | CT only cost efficient if prevalence is small                                            |
| Mizumoto et al. 2013 [67]  | Theory        | phenomen. / next generation operator | reduction of R0 by a factor | -        | focus on the onset; multitype-branching process, analysed by generating functions   | $R_{eff}$ , probability for extinction, duration of a minor outbreak                     |

## References

- [1] M. Agarwal and A. S. Bhadauria. Modeling H1N1 flu epidemic with contact tracing and quarantine. *Internat J Biomath.*, 05:1250038, 2012. doi:10.1142/s1793524511001805.
- [2] A. Aleta, D. Martín-Corral, A. P. y Piontti, M. Ajelli, M. Litvinova, M. Chinazzi, N. E. Dean, M. E. Halloran, I. M. L. Jr, S. Merler, A. Pentland, A. Vespignani, E. Moro, and Y. Moreno. Modelling the impact of testing, contact tracing and household quarantine on second waves of COVID-19. *Nature Human Behaviour*, 2020. doi:10.1038/s41562-020-0931-9.
- [3] J. P. Aparicio and J. C. Hernández. Preventive treatment of tuberculosis through contact tracing. *Contemporary Math*, 410:17–29, 2006. doi:10.1090/conm/410.
- [4] B. Armbruster and M. L. Brandeau. Contact tracing to control infectious disease: when enough is enough. *Health Care Manag. Sci.*, 10:341–355, 2007. doi:10.1007/s10729-007-9027-6.
- [5] B. Armbruster and M. L. Brandeau. Optimal mix of screening and contact tracing for endemic diseases. *Math Biosci*, 209:386–402, 2007. doi:10.1016/j.mbs.2007.02.007.
- [6] F. G. Ball, E. S. Knock, and P. D. O’Neill. Threshold behaviour of emerging epidemics featuring contact tracing. *Adv Appl Probab*, 43:1048–1065, 2011. doi:10.1239/aap/1324045698.
- [7] F. G. Ball, E. S. Knock, and P. D. O’Neill. Stochastic epidemic models featuring contact tracing with delays. *Math Biosci*, 266:23–35, 2015. doi:http://dx.doi.org/10.1016/j.mbs.2015.05.007.
- [8] M. T. Barlow. A branching process with contact tracing. *arXiv preprint*, 2020. arXiv:2007.16182.
- [9] A. Barrat, C. Cattuto, M. Kivela, S. Lehmann, and J. Saramaki. Effect of manual and digital contact tracing on COVID-19 outbreaks: a study on empirical contact data. *medRxiv preprint*, 2020. doi:10.1101/2020.07.24.20159947.
- [10] L. Baumgarten and S. Bornholdt. Epidemics with asymptomatic transmission: Sub-critical phase from recursive contact tracing. *arXiv preprint*, 2020. arXiv:2008.09896.
- [11] N. G. Becker, K. Glass, Z. Li, and G. K. Aldis. Controlling emerging infectious diseases like SARS. *Math Biosci*, 193:205–221, 2005. doi:10.1016/j.mbs.2004.07.006.
- [12] M. Begun, A. T. Newall, G. B. Marks, and J. G. Wood. Contact tracing of Tuberculosis: A systematic review of transmission modelling studies. *PLoS ONE*, 8:e72470, 2013. doi:10.1371/journal.pone.0072470.
- [13] T. Berge, A. J. O. Tassé, H. M. Tenkam, and J. Lubuma. Mathematical modeling of contact tracing as a control strategy of Ebola virus disease. *Internat J Biomath*, 11:1850093, 2018. doi:10.1142/s1793524518500936.
- [14] M. G. B. Blum and V. C. Tran. HIV with contact tracing: a case study in approximate bayesian computation. *Biostatistics*, 11:644–660, 2010. doi:10.1093/biostatistics/kxq022.

- [15] W. J. Bradshaw, E. C. Alley, J. H. Huggins, A. L. Lloyd, and K. M. Esvelt. Bidirectional contact tracing is required for reliable COVID-19 control. *medRxiv preprint*, 2020. doi:10.1101/2020.05.06.20093369.
- [16] I. Braithwaite, T. Callender, M. Bullock, and R. W. Aldridge. Automated and partly automated contact tracing: a systematic review to inform the control of COVID-19. *Lancet Digit Health*, 2020. doi:10.1016/s2589-7500(20)30184-9.
- [17] C. Browne, H. Gulbudak, and G. Webb. Modeling contact tracing in outbreaks with application to ebola. *J Theor Biol.*, 384:33–49, 2015. doi:10.1016/j.jtbi.2015.08.004.
- [18] V. B. Bulchandani, S. Shivam, S. Moudgalya, and S. L. Sondhi. Digital herd immunity and COVID-19. *medRxiv preprint*, 2020. doi:10.1101/2020.04.15.20066720.
- [19] S.-C. Chen, C.-F. Chang, and C.-M. Liao. Predictive models of control strategies involved in containing indoor airborne infections. *Indoor Air*, 16:469–481, 2006. doi:10.1111/j.1600-0668.2006.00443.x.
- [20] J. Clarke, K. A. J. White, and K. Turner. Exploring short-term responses to changes in the control strategy for Chlamydia trachomatis. *Comput Math Methods Med*, 2012:1–10, 2012. doi:10.1155/2012/803097.
- [21] J. Clarke, K. A. J. White, and K. Turner. Approximating optimal controls for networks when there are combinations of population-level and targeted measures available: Chlamydia infection as a case-study. *Bull Math Biol*, 75:1747–1777, 2013. doi:10.1007/s11538-013-9867-9.
- [22] S. Cléménçon, V. C. Tran, and H. de Arazoza. A stochastic SIR model with contact-tracing: large population limits and statistical inference. *J Biol Dyn*, 2:392–414, 2008. doi:10.1080/17513750801993266.
- [23] H. de Arazoza and R. Lounes. A non-linear model for a sexually transmitted disease with contact tracing. *IMA J Math Appl Med Biol*, 19:221–234, 2002. doi:10.1093/imammb/19.3.221.
- [24] L. D. Domenico, G. Pullano, C. E. Sabbatini, P.-Y. Boëlle, and V. Colizza. Impact of lockdown on COVID-19 epidemic in île-de-france and possible exit strategies. *BMC Medicine*, 18, 2020. doi:10.1186/s12916-020-01698-4.
- [25] K. Eames. Contact tracing strategies in heterogeneous populations. *Epidemiol Infect*, 135:443–454, 2007. doi:10.1017/S0950268806006923.
- [26] K. T. Eames and M. J. Keeling. Modeling dynamic and network heterogeneities in the spread of sexually transmitted diseases. *PNAS*, 99:13330 – 13335, 2002. doi:10.1073/pnas.20224429.
- [27] K. T. Eames and M. J. Keeling. Contact tracing and disease control. *Proc R Soc B*, 270:2565–2571, 2003. doi:10.1098/rspb.2003.2554.
- [28] M. Eichner. Case isolation and contact tracing can prevent the spread of smallpox. *Am J Epidemiol*, 158:118–128, 2003. doi:10.1093/aje/kwg104.

- [29] A. Endo, Q. J. Leclerc, G. M. Knight, G. F. Medley, K. E. Atkins, S. Funk, and A. J. Kucharski. Implication of backward contact tracing in the presence of overdispersed transmission in COVID-19 outbreaks. *Wellcome Open Research*, 5:239, 2020. doi:10.12688/wellcomeopenres.16344.1.
- [30] K. Farrahi, R. Emonet, and M. Cebrían. Epidemic contact tracing via communication traces. *PLoS ONE*, 9:e95133, 2014. doi:10.1371/journal.pone.0095133.
- [31] L. Ferretti, C. Wymant, M. Kendall, L. Zhao, A. Nurtay, L. Abeler-Dörner, M. Parker, D. Bonsall, and C. Fraser. Quantifying SARS-CoV-2 transmission suggests epidemic control with digital contact tracing. *Science*, 368:eabb6936, 2020. doi:10.1126/science.abb6936.
- [32] J. A. Firth, J. Hellewell, P. Klepac, S. Kissler, A. J. Kucharski, and L. G. Spurgin. Using a real-world network to model localized COVID-19 control strategies. *Nat Med*, 2020. doi:10.1038/s41591-020-1036-8.
- [33] C. Fraser, S. Riley, R. Anderson, and N. Ferguson. Factors that make an infectious disease outbreak controllable. *PNAS*, 101:6146–6151, 2004. doi:10.1073/pnas.0307506101.
- [34] G. Giordano, F. Blanchini, R. Bruno, P. Colaneri, A. Di Filippo, A. Di Matteo, and M. Colaneri. Modelling the COVID-19 epidemic and implementation of population-wide interventions in Italy. *Nat Med*, 2020. doi:10.1038/s41591-020-0883-7.
- [35] N. C. Grassly, M. Pons-Salort, E. P. K. Parker, P. J. White, N. M. Ferguson, K. Ainslie, M. Baguelin, S. Bhatt, A. Boonyasiri, N. Brazeau, L. Cattarino, H. Coupland, Z. Cucunuba, G. Cuomo-Dannenburg, A. Dighe, C. Donnelly, S. L. van Elsland, R. FitzJohn, S. Flaxman, K. Fraser, K. Gaythorpe, W. Green, A. Hamlet, W. Hinsley, N. Imai, E. Knock, D. Laydon, T. Mellan, S. Mishra, G. Nedjati-Gilani, P. Nouvellet, L. Okell, M. Ragonnet-Cronin, H. A. Thompson, H. J. T. Unwin, M. Vollmer, E. Volz, C. Walters, Y. Wang, O. J. Watson, C. Whittaker, L. Whittles, and X. Xi. Comparison of molecular testing strategies for COVID-19 control: a mathematical modelling study. *Lancet Infect Dis*, 2020. doi:10.1016/s1473-3099(20)30630-7.
- [36] C. Heffernan and J. A. Dunningham. Simplifying mathematical modelling to test intervention strategies for Chlamydia. *J Public Health Epidemiol*, 1:022–030, 2009. doi:10.5897/JPHE.9000113.
- [37] J. Hellewell, S. Abbott, A. Gimma, N. I. Bosse, C. I. Jarvis, T. W. Russell, J. D. Munday, A. J. Kucharski, W. J. Edmunds, S. Funk, R. M. Eggo, F. Sun, S. Flasche, B. J. Quilty, N. Davies, Y. Liu, S. Clifford, P. Klepac, M. Jit, C. Diamond, H. Gibbs, and K. van Zandvoort. Feasibility of controlling COVID-19 outbreaks by isolation of cases and contacts. *Lancet Glob Health*, 8:e488–e496, 2020. doi:10.1016/s2214-109x(20)30074-7.
- [38] E. Hernandez-Orallo, P. Manzoni, C. T. Calafate, and J.-C. Cano. Evaluating how smartphone contact tracing technology can reduce the spread of infectious diseases: the case of COVID-19. *IEEE Access*, pages 1–1, 2020. doi:10.1109/access.2020.2998042.
- [39] H. W. Hethcote and J. A. Yorke. Gonorrhoea transmission dynamics and control. *Lecture Notes in Biomathematics*, 56, 1984. doi:10.1007/978-3-662-07544-9.
- [40] T. House and M. J. Keeling. The impact of contact tracing in clustered populations. *PLoS Comput Biol*, 6:e1000721, 2010. doi:10.1371/journal.pcbi.1000721.

- [41] Y.-H. Hsieh, H. de Arazoza, R. Lounes, and J. Joanes. A class of methods for HIV contact tracing in Cuba: Implications for intervention and treatment. In *Deterministic and Stochastic Models of AIDS Epidemics and HIV Infections with Intervention*, pages 77–92. World Scientific, 2005. doi:10.1142/9789812569264\\_0004.
- [42] Y.-H. Hsieh, Y.-S. Wang, H. de Arazoza, and R. Lounes. Modeling secondary level of HIV contact tracing: its impact on HIV intervention in cuba. *BMC Infect Dis*, 10, 2010. doi:10.1186/1471-2334-10-194.
- [43] R. Huerta and L. S. Tsimring. Contact tracing and epidemics control in social networks. *Phys. Rev. E*, 66, 2002. doi:10.1103/physreve.66.056115.
- [44] J. M. Hyman, J. Li, and E. A. Stanley. Modeling the impact of random screening and contact tracing in reducing the spread of HIV. *Math Biosci*, 181:17–54, 2003. doi:10.1016/s0025-5564(02)00128-1.
- [45] C.-E. Juneau, A.-S. Briand, T. Pueyo, P. Collazzo, and L. Potvin. Effective contact tracing for COVID-19: A systematic review. *medRxiv preprint*, 2020. doi:10.1101/2020.07.23.20160234.
- [46] E. H. Kaplan, D. L. Craft, and L. M. Wein. Emergency response to a smallpox attack: The case for mass vaccination. *PNAS*, 99:10935–10940, 2002. doi:10.1073/pnas.162282799.
- [47] P. Kasaie, J. R. Andrews, W. D. Kelton, and D. W. Dowdy. Timing of tuberculosis transmission and the impact of household contact tracing. an agent-based simulation model. *Am J Respir Crit Care Med*, 189:845–852, 2014. doi:10.1164/rccm.201310-1846oc.
- [48] M. J. Keeling and K. T. Eames. Networks and epidemic models. *J R Soc Interface*, 2:295–307, 2005. doi:10.1098/rsif.2005.0051.
- [49] M. J. Keeling, T. D. Hollingsworth, and J. M. Read. Efficacy of contact tracing for the containment of the 2019 novel coronavirus (COVID-19). *J Epidemiol Community Health*, pages jech-2020-214051, 2020. doi:10.1136/jech-2020-214051.
- [50] H. Kim and A. Paul. Contact tracing: a game of big numbers in the time of COVID-19. *arXiv preprint*, 2020. arXiv:2004.10762v1.
- [51] I. Z. Kiss, D. M. Green, and R. R. Kao. Infectious disease control using contact tracing in random and scale-free networks. *J R Soc Interface*, 3:55–62, 2006. doi:10.1098/rsif.2005.0079.
- [52] I. Z. Kiss, D. M. Green, and R. R. Kao. The effect of network mixing patterns on epidemic dynamics and the efficacy of disease contact tracing. *J R Soc Interface*, 5:791–799, 2008. doi:10.1098/rsif.2007.1272.
- [53] D. Klinkenberg, C. Fraser, and H. Heesterbeek. The effectiveness of contact tracing in emerging epidemics. *PLoS ONE*, 1:e12, 2006. doi:10.1371/journal.pone.0000012.
- [54] S. Kojaku, L. Hébert-Dufresne, and Y.-Y. Ahn. The effectiveness of contact tracing in heterogeneous networks. *arXiv preprint*, 2020. arXiv:2005.02362v1.
- [55] M. Kretzschmar, K. M. E. Turner, P. M. Barton, W. J. Edmunds, and N. Low. Predicting the population impact of chlamydia screening programmes: comparative mathematical modelling study. *Sex Transm Infect*, 85:359–366, 2009. doi:10.1136/sti.2009.036251.

- [56] M. Kretzschmar, S. Van den Hof, J. Wallinga, and J. Van Wijngaarden. Ring vaccination and smallpox control. *Emerg Infect Dis*, 10:832, 2004. doi:10.3201/eid1005.030419.
- [57] M. Kretzschmar, Y. van Duynhoven, and A. Severijnen. Modeling prevention strategies for Gonorrhoea and Chlamydia using stochastic network simulations. *Am J Epidemiol*, 144:306–317, 1996. doi:10.1093/oxfordjournals.aje.a008926.
- [58] M. E. Kretzschmar, G. Rozhnova, M. C. J. Bootsma, M. van Boven, J. H. H. M. van de Wiggert, and M. J. M. Bonten. Impact of delays on effectiveness of contact tracing strategies for COVID-19: a modelling study. *The Lancet Public Health*, 5:e452–e459, 2020. doi:10.1016/s2468-2667(20)30157-2.
- [59] M. E. Kretzschmar, G. Rozhnova, and M. E. van Boven. Isolation and contact tracing can tip the scale to containment of COVID-19 in populations with social distancing. *medRxiv preprint*, 2020. doi:10.1101/2020.03.10.20033738.
- [60] A. J. Kucharski, P. Klepac, A. J. K. Conlan, S. M. Kissler, M. L. Tang, H. Fry, J. R. Gog, W. J. Edmunds, J. C. Emery, G. Medley, J. D. Munday, T. W. Russell, Q. J. Leclerc, C. Diamond, S. R. Procter, A. Gimma, F. Y. Sun, H. P. Gibbs, A. Rosello, K. van Zandvoort, S. Hué, S. R. Meakin, A. K. Deol, G. Knight, T. Jombart, A. M. Foss, N. I. Bosse, K. E. Atkins, B. J. Quilty, R. Lowe, K. Prem, S. Flasche, C. A. B. Pearson, R. M. G. J. Houben, E. S. Nightingale, A. Endo, D. C. Tully, Y. Liu, J. Villabona-Arenas, K. O’Reilly, S. Funk, R. M. Eggo, M. Jit, E. M. Rees, J. Hellewell, S. Clifford, C. I. Jarvis, S. Abbott, M. Auzenbergs, N. G. Davies, and D. Simons. Effectiveness of isolation, testing, contact tracing, and physical distancing on reducing transmission of SARS-CoV-2 in different settings: a mathematical modelling study. *Lancet Infect Dis*, 2020. doi:10.1016/s1473-3099(20)30457-6.
- [61] K. O. Kwok, A. Tang, V. W. Wei, W. H. Park, E. K. Yeoh, and S. Riley. Epidemic models of contact tracing: Systematic review of transmission studies of severe acute respiratory syndrome and middle east respiratory syndrome. *Comput Struct Biotechnol J*, 17:186–194, 2019. doi:10.1016/j.csbj.2019.01.003.
- [62] F. Liu, W. T. A. Enanoria, J. Zipprich, S. Blumberg, K. Harriman, S. F. Ackley, W. D. Wheaton, J. L. Allpress, and T. C. Porco. The role of vaccination coverage, individual behaviors, and the public health response in the control of measles epidemics: an agent-based simulation for california. *BMC Public Health*, 15, 2015. doi:10.1186/s12889-015-1766-6.
- [63] J. O. Lloyd-Smith, A. P. Galvani, and W. M. Getz. Curtailing transmission of severe acute respiratory syndrome within a community and its hospital. *Proc R Soc B*, 270:1979–1989, 2003. doi:10.1098/rspb.2003.2481.
- [64] L. Lorch, W. Trouleau, S. Tsirtsis, A. Szanto, B. Schölkopf, and M. Gomez-Rodriguez. A spatiotemporal epidemic model to quantify the effects of contact tracing, testing, and containment. *arXiv preprint*, 2020. arXiv:2004.07641v2.
- [65] D. Lunz, G. Batt, and J. Ruess. To isolate, or not to isolate: a theoretical framework for disease control via contact tracing. *medRxiv preprint*, 2020. doi:10.1101/2020.05.26.20113340.
- [66] G. R. Mellor, C. S. M. Currie, and E. L. Corbett. Incorporating household structure into a discrete-event simulation model of tuberculosis and HIV. *ACM Trans Model Comput Simul*, 21:1–17, 2011. doi:10.1145/2000494.2000499.

- [67] K. Mizumoto, K. Ejima, T. Yamamoto, and H. Nishiura. Vaccination and clinical severity: Is the effectiveness of contact tracing and case isolation hampered by past vaccination? *Int J Environ Res Public Health*, 10:816, 2013. doi:10.3390/ijerph10030816.
- [68] J. Müller and V. Hösel. Estimating the tracing probability from contact history at the onset of an epidemic. *Math Popul Stud*, 14:211–236, 2007. doi:10.1080/08898480701612857.
- [69] J. Müller and V. Hösel. Contact Tracing & Super-Spreaders in the Branching-Process Model. *arXiv preprint*, 2020. arXiv:2010.04942.
- [70] J. Müller and B. Koopmann. The effect of delay on contact tracing. *Math Biosci*, 282:204–214, 2016. doi:10.1016/j.mbs.2016.10.010.
- [71] J. Müller, M. Kretzschmar, and K. Dietz. Contact tracing in stochastic and deterministic epidemic models. *Math Biosci*, 164:39 – 64, 2000. doi:http://dx.doi.org/10.1016/S0025-5564(99)00061-9.
- [72] R. Naresh, A. Tripathi, and D. Sharma. A nonlinear HIV/AIDS model with contact tracing. *Appl Math Comput*, 217:9575–9591, 2011. doi:10.1016/j.amc.2011.04.033.
- [73] A. Okolie and J. Müller. Exact and approximate formulas for contact tracing on random trees. *Math Biosci*, 321:108320, 2020. doi:10.1016/j.mbs.2020.108320.
- [74] T. R. Pollmann, J. Pollmann, C. Wiesinger, C. Haack, L. Shtembari, A. Turcati, B. Neumair, S. Meighen-Berger, G. Zattera, M. Neumair, U. Apel, A. Okolie, J. Müller, S. Schoenert, and E. Resconi. The impact of digital contact tracing on the SARS-CoV-2 pandemic - a comprehensive modelling study. *medRxiv preprint*, 2020. doi:10.1101/2020.09.13.20192682.
- [75] T. C. Porco, K. A. Holbrook, S. E. Fernyak, D. L. Portnoy, R. Reiter, and T. J. Aragón. Logistics of community smallpox control through contact tracing and ring vaccination: a stochastic network model. *BMC Public Health*, 4, 2004. doi:10.1186/1471-2458-4-34.
- [76] C. Rivers, E. Lofgren, M. Marathe, S. Eubank, and B. Lewis. Modeling the impact of interventions on an epidemic of Ebola in Sierra Leone and Liberia. *PLoS Curr*, Edition 2, 2014. doi:10.1371/currents.outbreaks.4d41fe5d6c05e9df30ddce33c66d084c.
- [77] N. Shaban, M. Andersson, Åke Svensson, and T. Britton. Networks, epidemics and vaccination through contact tracing. *Math Biosci*, 216:1–8, 2008. doi:http://dx.doi.org/10.1016/j.mbs.2008.06.009.
- [78] N. M. Shahtori, T. Ferdousi, C. Scoglio, and F. D. Sahneh. Quantifying the impact of early-stage contact tracing on controlling ebola diffusion. *Math Biosc Engin*, 15:1165–1180, 2018. doi:10.3934/mbe.2018053.
- [79] T. Tanaka, T. Yamaguchi, and Y. Sakamoto. Estimation of the percentages of undiagnosed patients of the novel coronavirus (SARS-CoV-2) infection in hokkaido, japan by using birth-death process with recursive full tracing. *PLoS ONE*, 15:e0241170, 2020. doi:10.1371/journal.pone.0241170.
- [80] Y. Tian, F. Alawami, A. Al-Azem, N. Osgood, V. Hoepfner, and C. Dutchyn. A system dynamics model of tuberculosis diffusion with respect to contact tracing investigation. In *Proceedings of the 2011 Winter Simulation Conference (WSC)*, page e72470. IEEE, 2011. doi:10.1109/wsc.2011.6147857.

- [81] Y. Tian, N. D. Osgood, A. Al-Azem, and V. H. Hoepfner. Evaluating the effectiveness of contact tracing on tuberculosis outcomes in saskatchewan using individual-based modeling. *Health Educ. Behav.*, 40:98S–110S, 2013. doi:10.1177/1090198113493910.
- [82] L. S. Tsimring and R. Huerta. Modeling of contact tracing in social networks. *Physica A*, 325:33–39, 2003. doi:10.1016/s0378-4371(03)00180-8.
- [83] K. M. E. Turner, E. Adams, N. Gay, A. Ghani, C. Mercer, and W. J. Edmunds. Developing a realistic sexual network model of chlamydia transmission in Britain. *Theor Biol Med Model*, 3:3, 2006. doi:10.1186/1742-4682-3-3.
